# Supplementary material
Source: Springer Nature journal article supplement (https://www.springermedizin.de/resource/supplementary/12885_2009_1834_MOESM1_ESM.pdf/9460630)
Supplement: MOESM1 [file 9460630]

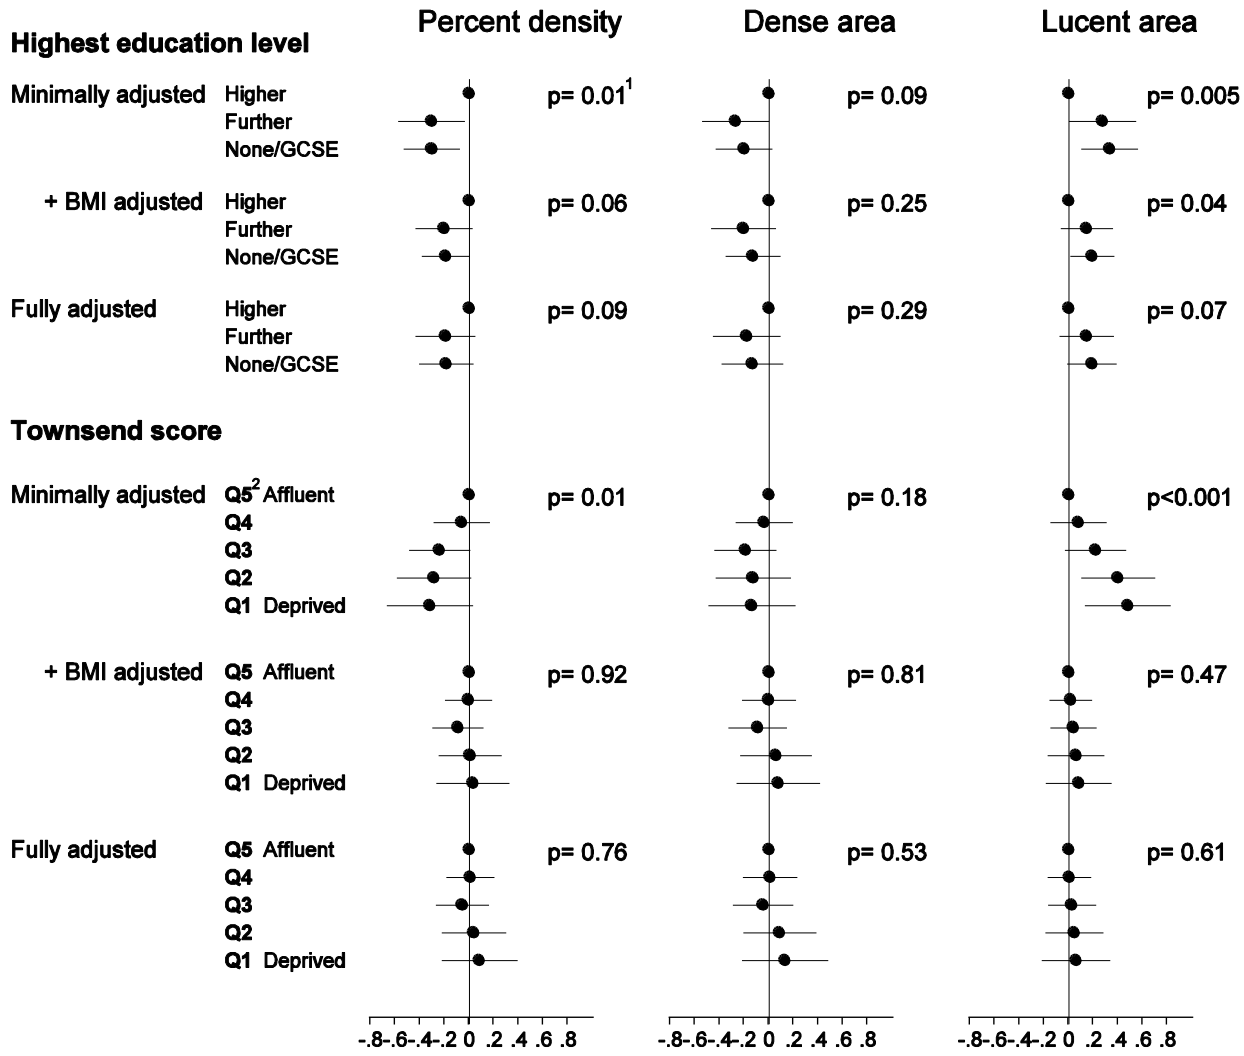

Difference in mammographic measure between each category and baseline, in multiples of standard deviations
